# Supplementary material
Source: Springer Nature journal article supplement (https://www.springermedizin.de/resource/supplementary/12889_2012_4105_MOESM3_ESM.pdf/9491254)

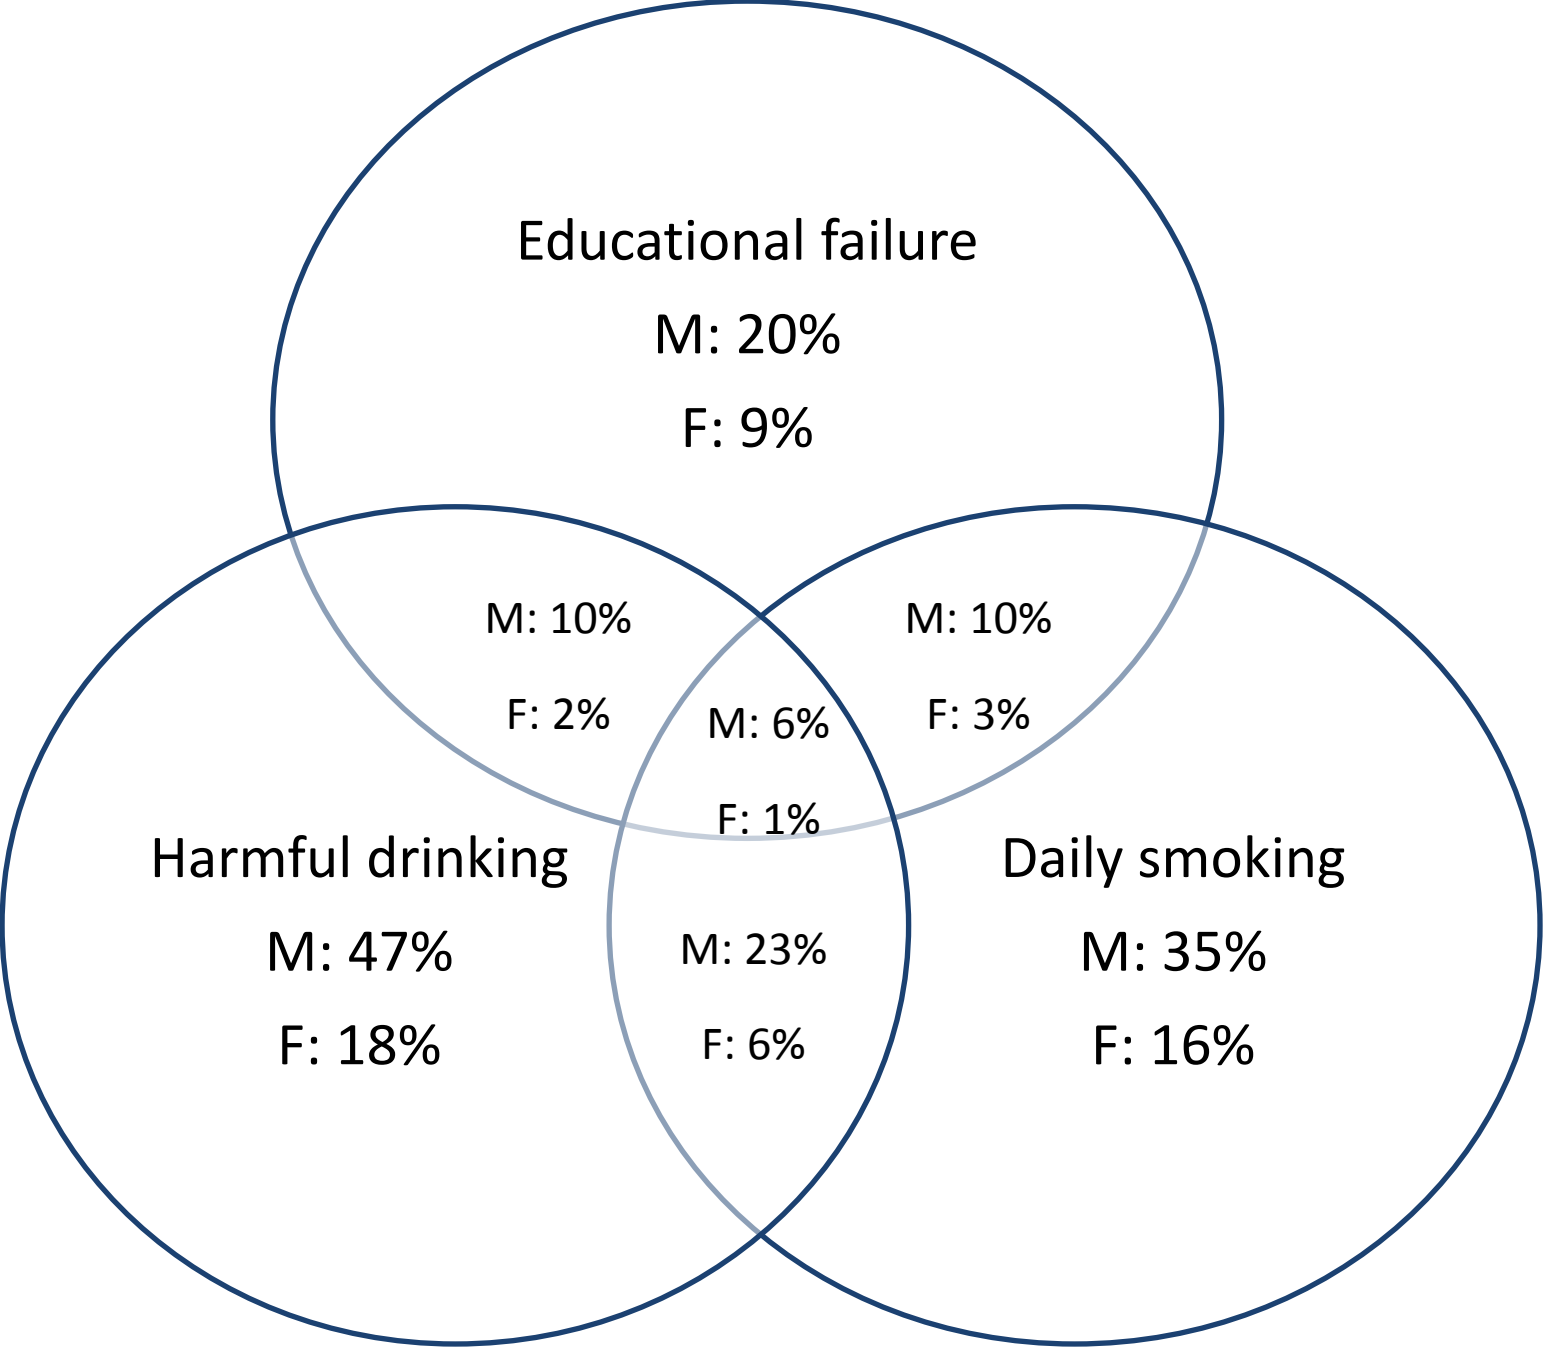

Educational failure

M: 20%

F: 9%

M: 10%

F: 2%

M: 10%

F: 3%

Harmful drinking

M: 47%

F: 18%

Daily smoking

M: 35%

F: 16%

M: 6%

F: 1%

M: 23%

F: 6%

Supplement: MOESM3 [file 9491254]
